# Supplementary material for: A Novel De Novo NFKBIA Missense Mutation Associated to Ectodermal Dysplasia with Dysgammaglobulinemia
Source: MDPI journal article supplement (doi:10.3390/genes13101900), 2022-10-19
Supplement: s1 [file s1]

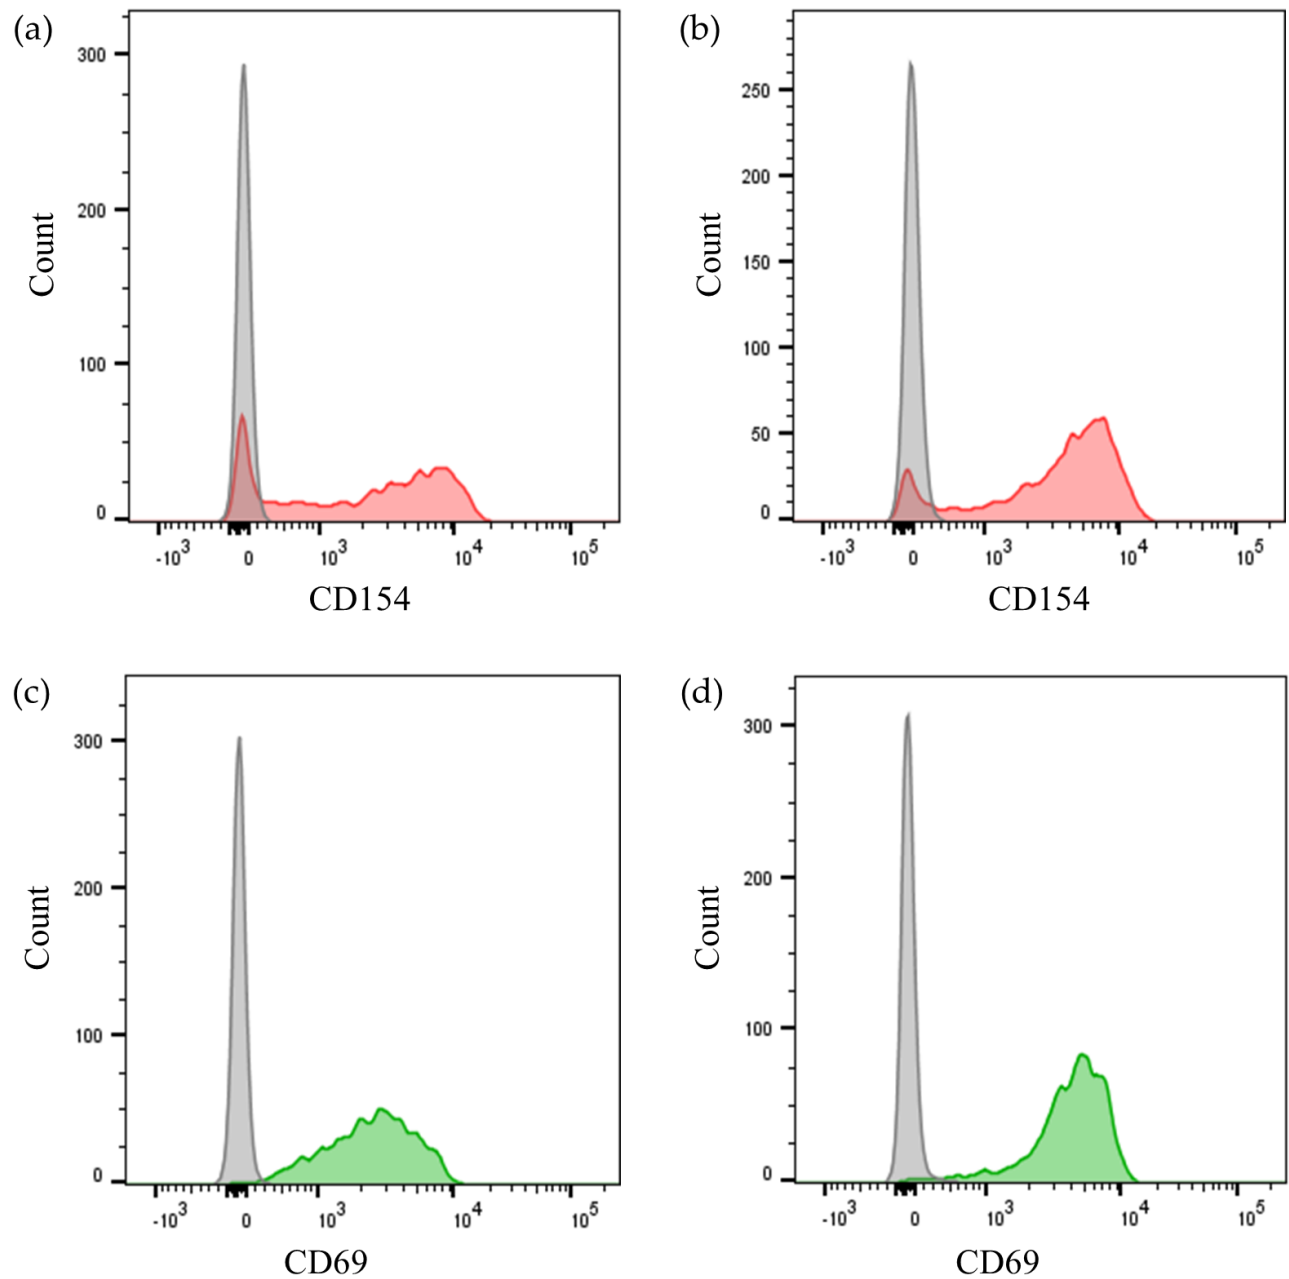

Figure S1. Cell surface expression of CD154 (CD40 ligand) on activated CD3<sup>+</sup> CD4<sup>+</sup> T-cells from healthy control and patient. Whole blood was stimulated *in vitro* with phorbol myristate acetate and calcium ionophore for 4 hours. The expression of CD154 and CD69 (a cell activation marker) were analyzed. The CD154 expression in stimulated cells (red histogram) is overlaid on unstimulated cells (grey histogram) of the (a) healthy control and (b) patient. The CD69 expression in stimulated cells (green histogram) is overlaid on unstimulated cells (grey histogram) of the (c) healthy control and (d) patient. Normal CD154 and CD69 expression are seen in the healthy control and patient.

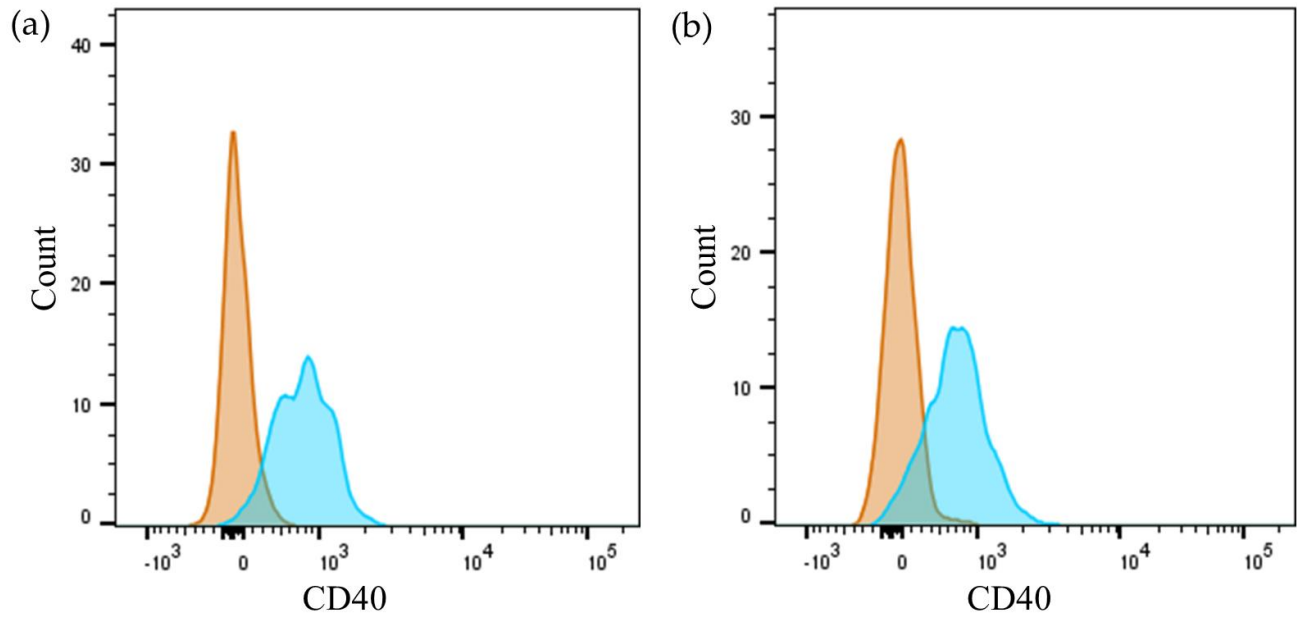

Figure S2. Flow cytometric analysis of CD40 expression in healthy control and patient. The CD40 expression on B cells (blue histogram) in the (a) healthy control and (b) patient were evaluated. The brown histogram represents the expression of isotype control. Both healthy control and patient had normal CD40 expression on B cells.

Table S1. Genes responsible for Ectodermal Dysplasias

| <b>Gene symbol(s)</b> | <b>Gene full name</b>                                                                                              |
|-----------------------|--------------------------------------------------------------------------------------------------------------------|
| <i>ED-1</i>           | ectodysplasin A                                                                                                    |
| <i>EDAR</i>           | ectodysplasin A receptor                                                                                           |
| <i>EDARADD</i>        | ectodysplasin A receptor associated death domain                                                                   |
| <i>NEMO/IKBKG</i>     | nuclear factor kappa B essential modulator/ inhibitor of nuclear factor kappa B kinase regulatory subunit $\gamma$ |
| <i>NFKBIA</i>         | nuclear factor kappa B inhibitor $\alpha$                                                                          |
| <i>IKBKB</i>          | inhibitor of nuclear factor kappa B kinase subunit $\beta$                                                         |
| <i>p63</i>            | tumor protein p63                                                                                                  |
| <i>DLX3</i>           | distal-less homeobox 3                                                                                             |
| <i>MSX1</i>           | msh homeobox 1                                                                                                     |
| <i>EVC2</i>           | EvC ciliary complex subunit 2                                                                                      |
| <i>EVC</i>            | EvC ciliary complex subunit 1                                                                                      |
| <i>GJB6</i>           | gap junction protein beta 6                                                                                        |
| <i>PVRL1</i>          | poliovirus receptor-like 1                                                                                         |
| <i>PKP1</i>           | plakophilin 1                                                                                                      |
| <i>CDH3</i>           | cadherin 3                                                                                                         |
| <i>WNT10A</i>         | Wnt family member 10A                                                                                              |

Table S2. List of five rare variants predicted to be damaging using *in silico* tools

| Gene            | Mutation                                                  | MAF<br>(gnomAD) | dbSNP       | SIFT | Polyphen2 | Mutation<br>Taster | CADD<br>phred | Genotype | ACMG<br>classification                |
|-----------------|-----------------------------------------------------------|-----------------|-------------|------|-----------|--------------------|---------------|----------|---------------------------------------|
| <i>SMARCAL1</i> | <i>SMARCAL1</i> :NM_001127207:<br>exon17:c.T2534A:p.L845Q | 0.0000853       | rs372298863 | D    | B         | D                  | 31            | het      | VUS with minor<br>pathogenic evidence |
| <i>TLR3</i>     | <i>TLR3</i> :NM_003265:<br>exon4:c.C2384T:p.A795V         | 0.00005692      | rs373118024 | D    | D         | D                  | 26.3          | het      | Uncertain<br>significance             |
| <i>CHD7</i>     | <i>CHD7</i> :NM_017780:<br>exon10:c.G2831A:p.R944H        | 0.0006          | rs117506164 | T    | D         | D                  | 26.2          | het      | Benign                                |
| <i>NFKBIA</i>   | <i>NFKBIA</i> :NM_020529:<br>exon1:c.A94T:p.S32C          | .               | .           | D    | D         | D                  | 26.1          | het      | Pathogenic                            |
| <i>ARHGEF1</i>  | <i>ARHGEF1</i> :NM_198977:<br>exon5:c.G256A:p.A86T        | 0.000008132     | rs371771035 | D    | D         | N                  | 23.5          | het      | Uncertain<br>significance             |

B, benign; D, damaging; het, heterozygous; MAF, minor allele frequency; N, neutral; T, tolerated; VUS, variant with uncertain significance.

Table S3. List of variants in the genes related to ectodermal dysplasia

| Gene           | Mutation                                               | MAF (gnomAD) | dbSNP      | SIFT | Polyphen2 | Mutation Taster | CADD phred | Genotype |
|----------------|--------------------------------------------------------|--------------|------------|------|-----------|-----------------|------------|----------|
| <i>PKP1</i>    | <i>PKP1</i> :NM_000299:<br>exon3:c.A586G;p.I196V       | 0.0622       | rs35507614 | T    | B         | P               | 0.001      | het      |
| <i>EDARADD</i> | <i>EDARADD</i> :NM_145861:<br>exon1:c.G27A;p.M9I       | 0.8412       | rs966365   | D    | B         | P               | 3.346      | hom      |
| <i>EDARADD</i> | <i>EDARADD</i> :NM_145861:<br>exon1:c.G60A;p.E20E      | 0.0459       | rs60808129 | .    | .         | .               | .          | het      |
| <i>EDAR</i>    | <i>EDAR</i> :NM_022336:<br>exon12:c.C1056T;p.C352C     | 0.8218       | rs12623957 | .    | .         | .               | .          | hom      |
| <i>EDAR</i>    | <i>EDAR</i> :NM_022336:<br>exon9:c.C750T;p.S250S       | 0.9188       | rs260632   | .    | .         | .               | .          | hom      |
| <i>EVC2</i>    | <i>EVC2</i> :NM_001166136:<br>exon20:c.C3267T;p.H1089H | 0.3906       | rs12511039 | .    | .         | .               | .          | het      |
| <i>EVC2</i>    | <i>EVC2</i> :NM_001166136:<br>exon14:c.A1855G;p.T619A  | 0.3639       | rs730469   | T    | B         | P               | 0.001      | het      |
| <i>EVC2</i>    | <i>EVC2</i> :NM_001166136:<br>exon5:c.A448G;p.S150G    | 0.2384       | rs4689278  | T    | B         | P               | 7.914      | het      |
| <i>EVC</i>     | <i>EVC</i> :NM_001306090:<br>exon6:c.C769T;p.L257L     | 0.9477       | rs6446393  | .    | .         | .               | .          | hom      |
| <i>EVC</i>     | <i>EVC</i> :NM_001306090:<br>exon6:c.T772C;p.Y258H     | 0.7967       | rs6414624  | T    | B         | P               | 8.779      | hom      |
| <i>EVC</i>     | <i>EVC</i> :NM_001306090:<br>exon8:c.A1068G;p.L356L    | 0.2974       | rs33929747 | .    | .         | .               | .          | hom      |
| <i>EVC</i>     | <i>EVC</i> :NM_001306090:<br>exon10:c.C1346A;p.T449K   | 0.7901       | rs2302075  | T    | B         | P               | 5.813      | hom      |
| <i>EVC</i>     | <i>EVC</i> :NM_001306090:<br>exon12:c.G1727A;p.R576Q   | 0.3486       | rs1383180  | T    | D         | P               | 24.9       | het      |
| <i>EVC</i>     | <i>EVC</i> :NM_001306090:<br>exon13:c.C1854T;p.G618G   | 0.3563       | rs11737221 | .    | .         | .               | .          | het      |
| <i>PVRL1</i>   | <i>PVRL1</i> :NM_203285:<br>exon6:c.T1082G;p.V361G     | 0.9219       | rs7940667  | T    | B         | P               | 1.197      | hom      |
| <i>NFKBIA</i>  | <i>NFKBIA</i> :NM_020529:<br>exon2:c.C306T;p.A102A     | 0.1666       | rs1050851  | .    | .         | .               | .          | het      |
| <i>NFKBIA</i>  | <i>NFKBIA</i> :NM_020529:<br>exon1:c.A94T;p.S32C       | .            | .          | D    | D         | D               | 26.1       | het      |
| <i>CDH3</i>    | <i>CDH3</i> :NM_001317195:<br>exon16:c.A2334C;p.R778S  | 0.2614       | rs3114409  | T    | .         | P               | 0.085      | het      |
| <i>DLX3</i>    | <i>DLX3</i> :NM_005220:<br>exon2:c.G402A;p.T134T       | 0.2064       | rs2303466  | .    | .         | .               | .          | hom      |

B, benign; D, damaging; het, heterozygous; hom, homozygous; MAF, minor allele frequency; P, polymorphism; T, tolerated. The variant with MAF < 0.0001 is considered as rare variant. The pathogenic variant is highlighted in red.
